# Supplementary material for: SPDL1 Is an Independent Predictor of Patient Outcome in Colorectal Cancer
Source: MDPI journal article supplement (doi:10.3390/ijms23031819), 2022-02-05
Supplement: s1 [file s1]

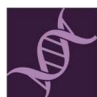

**Table S1.** Univariate and multivariate Cox regression analyses of OS for CRC patients in the TMA cohort (n=75) with the AJCC TNM stages as the adjusting variables instead of pT, pN, pM categories.

| Variable         | Univariate analysis |        |       |              | Multivariate analysis |        |       |              |
|------------------|---------------------|--------|-------|--------------|-----------------------|--------|-------|--------------|
|                  | HR                  | 95% CI |       | p            | HR                    | 95% CI |       | p            |
|                  |                     | lower  | upper |              |                       | lower  | upper |              |
| SPDL1            | 0.45                | 0.25   | 0.82  | <b>0.009</b> | 0.42                  | 0.22   | 0.79  | <b>0.008</b> |
| age              | 1.09                | 0.61   | 1.93  | 0.77         | 1.40                  | 0.72   | 2.71  | 0.32         |
| gender           | 0.99                | 0.55   | 1.75  | 0.96         | 1.34                  | 0.72   | 2.49  | 0.35         |
| grade            | 2.58                | 1.00   | 6.69  | 0.05         | 4.28                  | 1.51   | 12.14 | <b>0.006</b> |
| pT               | 2.30                | 0.91   | 5.83  | 0.08         | -                     | -      | -     | -            |
| pN               | 1.70                | 0.93   | 3.11  | 0.09         | -                     | -      | -     | -            |
| pM               | 2.81                | 1.55   | 5.08  | <b>0.001</b> | -                     | -      | -     | -            |
| resection margin | 1.86                | 0.98   | 3.53  | 0.06         | 2.28                  | 1.06   | 4.89  | <b>0.04</b>  |
| tumor stage      |                     |        |       |              |                       |        |       |              |
| stage IV         |                     | Ref.   |       |              |                       | Ref.   |       |              |
| stage I          | 0.18                | 0.02   | 1.31  | 0.09         | 0.18                  | 0.02   | 1.39  | 0.10         |
| stage II         | 0.28                | 0.12   | 0.64  | <b>0.003</b> | 0.27                  | 0.11   | 0.65  | <b>0.004</b> |
| stage III        | 0.48                | 0.24   | 0.98  | <b>0.04</b>  | 0.31                  | 0.14   | 0.68  | <b>0.003</b> |
| tumor location   |                     |        |       |              |                       |        |       |              |
| rectum           |                     | Ref.   |       |              |                       | Ref.   |       |              |
| right colon      | 1.29                | 0.66   | 2.52  | 0.46         | 2.19                  | 1.06   | 4.49  | <b>0.03</b>  |
| left colon       | 0.99                | 0.49   | 2.01  | 0.98         | 1.56                  | 0.71   | 3.44  | 0.27         |

Abbreviations: CI - confidence interval, CRC - colorectal cancer, HR - hazard ratio, OS - overall survival, pM - distant metastasis, pN - regional lymph node, pT - primary tumor, Ref. - reference, TMA - tissue microarray. TNM stage is based on AJCC 8th edition. Significant p-values ( $p < 0.05$ ) are indicated in bold.

**Table S2.** Univariate and multivariate Cox regression analyses of OS for CRC patients in the TMA cohort (n=75). Expression of SPDL1 was used as a continuous variable.

| Variable         | Univariate analysis |        |       |              | Multivariate analysis:<br>SPDL1 (IRS) |        |       |              | Multivariate analysis:<br>SPDL1 (IS) |        |       |               |
|------------------|---------------------|--------|-------|--------------|---------------------------------------|--------|-------|--------------|--------------------------------------|--------|-------|---------------|
|                  | HR                  | 95% CI |       | p            | HR                                    | 95% CI |       | p            | HR                                   | 95% CI |       | p             |
|                  |                     | lower  | upper |              |                                       | lower  | upper |              |                                      | lower  | upper |               |
| SPDL1 (IRS)      | 0.86                | 0.75   | 0.99  | <b>0.03</b>  | 0.82                                  | 0.70   | 0.96  | <b>0.01</b>  | -                                    | -      | -     | -             |
| SPDL1 (IS)       | 0.55                | 0.32   | 0.94  | <b>0.03</b>  | -                                     | -      | -     | -            | 0.45                                 | 0.24   | 0.85  | <b>0.01</b>   |
| age              | 1.00                | 0.97   | 1.03  | 0.86         | 1.49                                  | 0.76   | 2.92  | 0.24         | 1.48                                 | 0.76   | 2.90  | 0.25          |
| gender           | 0.99                | 0.55   | 1.75  | 0.96         | 1.34                                  | 0.72   | 2.50  | 0.36         | 1.32                                 | 0.71   | 2.46  | 0.38          |
| grade            | 2.58                | 1.00   | 6.69  | 0.05         | 3.79                                  | 1.32   | 10.88 | <b>0.01</b>  | 3.78                                 | 1.32   | 10.85 | <b>0.01</b>   |
| pT               | 2.30                | 0.91   | 5.83  | 0.08         | 2.27                                  | 0.86   | 6.01  | 0.10         | 2.25                                 | 0.85   | 5.97  | 0.10          |
| pN               | 1.70                | 0.93   | 3.11  | 0.09         | 1.05                                  | 0.53   | 2.07  | 0.88         | 1.04                                 | 0.53   | 2.05  | 0.92          |
| pM               | 2.81                | 1.55   | 5.08  | <b>0.001</b> | 3.15                                  | 1.65   | 6.03  | <b>0.001</b> | 3.17                                 | 1.66   | 6.08  | <b>0.0005</b> |
| TNM stage        | 2.93                | 1.37   | 6.27  | <b>0.006</b> | -                                     | -      | -     | -            | -                                    | -      | -     | -             |
| resection margin | 1.86                | 0.98   | 3.53  | 0.06         | 2.73                                  | 1.24   | 6.03  | <b>0.01</b>  | 2.71                                 | 1.23   | 5.97  | <b>0.01</b>   |
| tumor location   |                     |        |       |              |                                       |        |       |              |                                      |        |       |               |
| rectum           |                     | Ref.   |       |              |                                       | Ref.   |       |              |                                      | Ref.   |       |               |
| right colon      | 1.29                | 0.66   | 2.52  | 0.46         | 2.01                                  | 0.97   | 4.15  | 0.06         | 1.99                                 | 0.96   | 4.11  | 0.06          |
| left colon       | 0.99                | 0.49   | 2.01  | 0.98         | 1.40                                  | 0.64   | 3.06  | 0.41         | 1.40                                 | 0.64   | 3.06  | 0.40          |

Abbreviations: CI - confidence interval, CRC - colorectal cancer, HR - hazard ratio, IRS - immunoreactive score, IS - staining intensity, OS - overall survival, pM - distant metastasis, pN - regional lymph node, pT - primary tumor.

TMA - tissue microarray. TNM stage is based on AJCC 8th edition. AJCC TNM stage categories are: I-II vs. III-IV. “-” indicates variable was not included in multivariate Cox analysis. Significant p-values ( $p < 0.05$ ) are indicated in bold.

**Table. S3.** Univariate and multivariate Cox regression analyses of OS for CRC patients in the TMA cohort. Analyses were restricted to individuals with complete data ( $n=59$ ).

| Variable         | Univariate analysis |        |       |              | Multivariate analysis |        |       |              |
|------------------|---------------------|--------|-------|--------------|-----------------------|--------|-------|--------------|
|                  | HR                  | 95% CI |       | <i>p</i>     | HR                    | 95% CI |       | <i>p</i>     |
|                  |                     | lower  | upper |              |                       | Lower  | upper |              |
| SPDL1            | 0.37                | 0.18   | 0.75  | <b>0.006</b> | 0.30                  | 0.13   | 0.70  | <b>0.005</b> |
| age              | 1.40                | 0.70   | 2.77  | 0.34         | 2.26                  | 0.88   | 5.83  | 0.09         |
| gender           | 0.81                | 0.41   | 1.61  | 0.55         | 1.32                  | 0.60   | 2.91  | 0.49         |
| grade            | 2.16                | 0.75   | 6.23  | 0.15         | 2.85                  | 0.88   | 9.20  | 0.08         |
| pT               | 1.73                | 0.61   | 4.94  | 0.30         | 1.26                  | 0.40   | 4.01  | 0.69         |
| pN               | 2.01                | 0.98   | 4.13  | 0.06         | 1.56                  | 0.69   | 3.52  | 0.29         |
| pM               | 3.05                | 1.51   | 6.19  | <b>0.002</b> | 2.39                  | 1.06   | 5.36  | <b>0.04</b>  |
| TNM stage        | 3.76                | 1.45   | 9.74  | <b>0.006</b> | -                     | -      | -     | -            |
| resection margin | 1.66                | 0.72   | 3.83  | 0.23         | 3.06                  | 0.90   | 10.38 | 0.07         |
| tumor location   |                     |        |       |              |                       |        |       |              |
| rectum           |                     | Ref.   |       |              |                       | Ref.   |       |              |
| right colon      | 1.41                | 0.62   | 3.22  | 0.42         | 2.51                  | 0.96   | 6.57  | 0.06         |
| left colon       | 1.20                | 0.49   | 2.95  | 0.70         | 2.86                  | 0.90   | 9.13  | 0.08         |

Abbreviations: CI - confidence interval, CRC - colorectal cancer, HR - hazard ratio, OS - overall survival, pM - distant metastasis, pN - regional lymph node, pT - primary tumor, TMA - tissue microarray. TNM stage is based on AJCC 8th edition. AJCC TNM stage categories are: I-II vs. III-IV. “-” indicates variable was not included in multivariate Cox analysis. Significant p-values ( $p < 0.05$ ) are indicated in bold.

**Table. S4.** Univariate and multivariate Cox regression analyses of OS for CRC patients in the TCGA cohort ( $n=275$ ) with the TNM stages as the adjusting variables instead of pT, pN, pM categories.

| Variable    | Univariate analysis |        |       |                   | Multivariate analysis |        |       |                   |
|-------------|---------------------|--------|-------|-------------------|-----------------------|--------|-------|-------------------|
|             | HR                  | 95% CI |       | <i>p</i>          | HR                    | 95% CI |       | <i>p</i>          |
|             |                     | lower  | upper |                   |                       | lower  | upper |                   |
| SPDL1       | 0.41                | 0.18   | 0.96  | <b>0.04</b>       | 0.38                  | 0.16   | 0.88  | <b>0.02</b>       |
| age         | 1.68                | 1.01   | 2.81  | <b>0.047</b>      | 2.25                  | 1.30   | 3.89  | <b>0.004</b>      |
| gender      | 1.42                | 0.86   | 2.33  | 0.17              | 1.12                  | 0.67   | 1.86  | 0.68              |
| pT          | 3.23                | 1.17   | 8.89  | <b>0.02</b>       | -                     | -      | -     | -                 |
| pN          | 2.45                | 1.50   | 4.02  | <b>0.0004</b>     | -                     | -      | -     | -                 |
| pM          | 3.71                | 2.16   | 6.36  | <b>&lt;0.0001</b> | -                     | -      | -     | -                 |
| tumor stage |                     |        |       |                   |                       |        |       |                   |
| stage I     |                     | Ref.   |       |                   |                       | Ref.   |       |                   |
| stage II    | 2.25                | 0.67   | 7.64  | 0.19              | 2.34                  | 0.69   | 7.93  | 0.17              |
| stage III   | 4.30                | 1.30   | 14.26 | <b>0.02</b>       | 5.12                  | 1.54   | 17.01 | <b>0.008</b>      |
| stage IV    | 10.08               | 2.98   | 34.14 | <b>0.002</b>      | 14.47                 | 4.20   | 49.81 | <b>&lt;0.0001</b> |

Abbreviations: CI - confidence interval, CRC - colorectal cancer, HR - hazard ratio, OS - overall survival, pM - distant metastasis, pN - regional lymph node, pT - primary tumor, Ref. – reference. TNM stage is based on AJCC 8th edition. Significant p-values ( $p < 0.05$ ) are indicated in bold.

**Table S5.** A medium-confidence ( $\geq 0.4$ ) set of *SPDL1*-positively correlated genes.

| Genes     | R    | BUB3     | 0.59 | SFRS7     | 0.54 | HAUS8    | 0.51 | PSMD6   | 0.49 |
|-----------|------|----------|------|-----------|------|----------|------|---------|------|
| PLK4      | 0.72 | ASPM     | 0.59 | CASP8AP2  | 0.54 | NAA15    | 0.51 | UTP15   | 0.49 |
| KIF18A    | 0.72 | STIL     | 0.59 | CDCA5     | 0.54 | C15orf42 | 0.51 | RIF1    | 0.49 |
| TRA2B     | 0.71 | KIF2C    | 0.59 | HNRNPA2B1 | 0.54 | RAD23B   | 0.51 | RAD54L  | 0.49 |
| KIAA1524  | 0.70 | Genes    | R    | RAD51     | 0.54 | EIF2S1   | 0.51 | KPNB1   | 0.49 |
| BUB1      | 0.70 | LMNB1    | 0.58 | SET       | 0.54 | SKP2     | 0.51 | CENPF   | 0.49 |
| BUB1B     | 0.70 | G3BP1    | 0.58 | NDC80     | 0.54 | DHX9     | 0.51 | DCLRE1A | 0.49 |
| SGOL2     | 0.69 | RACGAP1  | 0.58 | TRIP13    | 0.54 | FAM98B   | 0.51 | TUBA1B  | 0.49 |
| SGOL1     | 0.68 | CEP78    | 0.58 | Genes     | R    | RAD18    | 0.51 | ATAD2   | 0.49 |
| KIF20A    | 0.68 | KIF14    | 0.58 | EZH2      | 0.53 | MTBP     | 0.51 | POLE2   | 0.49 |
| NCAPG     | 0.67 | ATAD5    | 0.58 | CTPS      | 0.53 | EPT1     | 0.50 | MTRF1L  | 0.49 |
| NCAPH     | 0.67 | KIF20B   | 0.58 | CHAF1B    | 0.53 | CENPL    | 0.50 | SKIV2L2 | 0.48 |
| ZWILCH    | 0.67 | CHEK1    | 0.58 | SUV39H2   | 0.53 | Genes    | R    | NEK4    | 0.48 |
| MCM10     | 0.66 | POLQ     | 0.58 | E2F8      | 0.53 | CDCA2    | 0.50 | NUP50   | 0.48 |
| CKAP2L    | 0.66 | TIPIN    | 0.58 | XPO1      | 0.53 | ESPL1    | 0.50 | SFRS2   | 0.48 |
| DLGAP5    | 0.66 | SKA2     | 0.58 | WDR62     | 0.53 | BBS7     | 0.50 | CDC25C  | 0.48 |
| TTK       | 0.65 | CHAF1A   | 0.58 | CDC27     | 0.53 | CHUK     | 0.50 | Genes   | R    |
| NUSAP1    | 0.65 | ECT2     | 0.58 | NUP188    | 0.53 | WDR67    | 0.50 | LMNB2   | 0.48 |
| ARHGAP11A | 0.65 | NEDD1    | 0.58 | MAD2L1    | 0.53 | ORC6L    | 0.50 | PPP5C   | 0.48 |
| CCNA2     | 0.65 | DNMT1    | 0.58 | MCM2      | 0.53 | ARL13B   | 0.50 | NUP210  | 0.48 |
| EXO1      | 0.65 | HMMR     | 0.58 | FEN1      | 0.53 | TCF19    | 0.50 | RAD1    | 0.48 |
| SASS6     | 0.65 | CDC45    | 0.57 | USP1      | 0.53 | OIP5     | 0.50 | IARS    | 0.48 |
| SMC4      | 0.65 | MKI67    | 0.57 | MSH6      | 0.53 | MCM4     | 0.50 | RMI1    | 0.48 |
| ANKRD32   | 0.64 | CLSPN    | 0.57 | HOMER1    | 0.53 | CCNF     | 0.50 | BRCA1   | 0.48 |
| KIF23     | 0.64 | DTL      | 0.57 | TMEM194A  | 0.53 | DCLRE1B  | 0.50 | CDCA4   | 0.48 |
| CEP55     | 0.64 | CASC5    | 0.57 | GMPS      | 0.53 | NAA50    | 0.50 | HNRNPK  | 0.48 |
| CCNB1     | 0.64 | FANCM    | 0.57 | KIF4A     | 0.52 | ABCE1    | 0.50 | DNAJB11 | 0.48 |
| DEPDC1B   | 0.64 | SFRS1    | 0.57 | TMPO      | 0.52 | NOC3L    | 0.50 | CAND1   | 0.48 |
| FBXO5     | 0.63 | ORC1L    | 0.57 | NUP160    | 0.52 | SSRP1    | 0.50 | HSPA4   | 0.48 |
| RRM1      | 0.63 | SPAG5    | 0.57 | KNTC1     | 0.52 | RPAP3    | 0.50 | RIBC2   | 0.48 |
| KIF11     | 0.63 | TOP2A    | 0.57 | PTTG1     | 0.52 | HNRNPC   | 0.50 | ZNF367  | 0.48 |
| HELLS     | 0.63 | GSG2     | 0.57 | SUZ12     | 0.52 | ZNF714   | 0.50 | METAP2  | 0.48 |
| SMC2      | 0.63 | LIN54    | 0.57 | NUP107    | 0.52 | GTF2H3   | 0.50 | PDHX    | 0.48 |
| MASTL     | 0.63 | DNAJC9   | 0.56 | FAM54A    | 0.52 | G2E3     | 0.50 | CDC25A  | 0.48 |
| FANCI     | 0.63 | CCNB2    | 0.56 | POLA2     | 0.52 | DHFR     | 0.50 | LRRC58  | 0.48 |
| MELK      | 0.62 | SCLT1    | 0.56 | VRK1      | 0.52 | HSPA14   | 0.50 | H2AFZ   | 0.48 |
| CDC7      | 0.62 | WDR76    | 0.56 | CNOT6     | 0.52 | HAUS6    | 0.50 | HNRNPL  | 0.48 |
| ANLN      | 0.62 | SFRS13A  | 0.56 | MTHFD2    | 0.52 | C1orf135 | 0.50 | NSD1    | 0.48 |
| DNA2      | 0.62 | CDC20    | 0.56 | TARDBP    | 0.52 | TNPO1    | 0.50 | C4orf46 | 0.48 |
| ZWINT     | 0.62 | TAF5     | 0.56 | LIN9      | 0.52 | CWC27    | 0.50 | PCGF6   | 0.48 |
| CENPO     | 0.62 | KIF15    | 0.56 | KIFC1     | 0.52 | MPHOSPH9 | 0.49 | NCAPG2  | 0.48 |
| WDHD1     | 0.62 | KIF18B   | 0.56 | SKA1      | 0.52 | GINS4    | 0.49 | SPATA5  | 0.48 |
| DEPDC1    | 0.62 | GINS3    | 0.56 | INCENP    | 0.52 | KRR1     | 0.49 | CCNE2   | 0.47 |
| SHCBP1    | 0.62 | HMGXB4   | 0.55 | EXOSC2    | 0.52 | FAM111B  | 0.49 | KPNA2   | 0.47 |
| ARHGAP11B | 0.61 | SFXN1    | 0.55 | PSIP1     | 0.52 | MCM3     | 0.49 | CSTF3   | 0.47 |
| E2F7      | 0.61 | DONSON   | 0.55 | DIAPH3    | 0.52 | BCCIP    | 0.49 | GTPBP4  | 0.47 |
| CENPE     | 0.61 | GABPB1   | 0.55 | DDX46     | 0.52 | RBM27    | 0.49 | TDG     | 0.47 |
| C6orf167  | 0.61 | MSH2     | 0.55 | WHSC1     | 0.52 | PARP2    | 0.49 | KIF2A   | 0.47 |
| NEIL3     | 0.61 | C18orf54 | 0.55 | CDK2      | 0.52 | TMEM48   | 0.49 | UBE2T   | 0.47 |
| HNRNPR    | 0.60 | NEK2     | 0.55 | C11orf82  | 0.52 | PDE12    | 0.49 | ZNF143  | 0.47 |
| C15orf23  | 0.60 | PRR11    | 0.55 | NPM1      | 0.52 | SMC3     | 0.49 | CEP135  | 0.47 |
| HJURP     | 0.60 | GTSE1    | 0.55 | PSMC3IP   | 0.52 | PRIM1    | 0.49 | ASF1B   | 0.47 |
| CENPA     | 0.60 | TOPBP1   | 0.55 | BARD1     | 0.52 | CLEC2D   | 0.49 | SNRNP27 | 0.47 |
| RFC5      | 0.60 | UHRF1    | 0.55 | SFRS3     | 0.52 | XRCC2    | 0.49 | HAUS2   | 0.47 |
| MCM6      | 0.60 | CPSF6    | 0.55 | TCP1      | 0.51 | UCHL5    | 0.49 | PSRC1   | 0.47 |
| C10orf119 | 0.60 | PLK1     | 0.55 | RRM2      | 0.51 | DDX1     | 0.49 | DHX29   | 0.47 |
| BRIP1     | 0.60 | GRPEL2   | 0.54 | CKAP5     | 0.51 | TCOF1    | 0.49 | PMS1    | 0.47 |
| RFC4      | 0.59 | FANCD2   | 0.54 | CDKN3     | 0.51 | BLM      | 0.49 | MRPL19  | 0.47 |
| RARS      | 0.59 | NUF2     | 0.54 | C14orf145 | 0.51 | GPN3     | 0.49 | CENPN   | 0.47 |
| GSTCD     | 0.59 | SPC25    | 0.54 | WDR43     | 0.51 | FAF2     | 0.49 | RBMX    | 0.47 |
| PRC1      | 0.59 | HBS1L    | 0.54 | CCDC138   | 0.51 | UBA6     | 0.49 | ETF1    | 0.47 |
| CDC23     | 0.59 | CCAR1    | 0.54 | CENPK     | 0.51 | FANCB    | 0.49 | HIATL1  | 0.47 |
| HAT1      | 0.59 | CENPI    | 0.54 | CDCA8     | 0.51 | TUBB     | 0.49 | MLF1IP  | 0.47 |
| CDK1      | 0.59 | NCAPD3   | 0.54 | DHX15     | 0.51 | SRP72    | 0.49 | GEN1    | 0.47 |
| EXOSEC9   | 0.59 | IPO11    | 0.54 | TIMELESS  | 0.51 | FAM72D   | 0.49 | RSRC1   | 0.47 |

|              |          |              |          |              |          |              |          |              |          |
|--------------|----------|--------------|----------|--------------|----------|--------------|----------|--------------|----------|
| PPM1G        | 0.47     | NUP37        | 0.45     | SMC6         | 0.43     | POLR1B       | 0.42     | UBXN2A       | 0.41     |
| PRPF4        | 0.47     | SENPI        | 0.45     | ERCC8        | 0.43     | C5orf24      | 0.42     | FAM98A       | 0.41     |
| ANP32E       | 0.47     | PTPN11       | 0.45     | SLC31A1      | 0.43     | SAMD8        | 0.42     | USP14        | 0.41     |
| LEO1         | 0.47     | NUP43        | 0.45     | IPPK         | 0.43     | XPOT         | 0.42     | CEP120       | 0.41     |
| USP13        | 0.47     | NASP         | 0.45     | SMC1A        | 0.43     | BUD13        | 0.42     | C18orf55     | 0.41     |
| PSMA4        | 0.47     | PRIM2        | 0.45     | FAM116A      | 0.43     | PBK          | 0.42     | STXBP4       | 0.41     |
| PA2G4        | 0.47     | UBR7         | 0.45     | RBM15        | 0.43     | PSMD11       | 0.42     | ARNTL2       | 0.41     |
| UIMC1        | 0.46     | RBM17        | 0.45     | BIRC5        | 0.43     | POLR3A       | 0.42     | ATG4C        | 0.41     |
| NCL          | 0.46     | BDP1         | 0.45     | POLD3        | 0.43     | STAG1        | 0.42     | QSER1        | 0.41     |
| SFPQ         | 0.46     | USP39        | 0.45     | NBN          | 0.43     | PWP1         | 0.42     | MNS1         | 0.41     |
| RQCD1        | 0.46     | STT3A        | 0.45     | CKS1B        | 0.43     | ZNF519       | 0.42     | CEBPZ        | 0.41     |
| HSPA9        | 0.46     | UBA5         | 0.45     | TBP          | 0.43     | PTPLAD1      | 0.42     | TFAM         | 0.41     |
| C10orf18     | 0.46     | PATL1        | 0.45     | PDS5A        | 0.43     | MAP2K1       | 0.42     | RAD51AP1     | 0.41     |
| RTKN2        | 0.46     | UMPS         | 0.45     | EED          | 0.43     | SAE1         | 0.42     | R3HDM1       | 0.41     |
| DSCC1        | 0.46     | RAD54B       | 0.45     | C17orf53     | 0.43     | ZNF37A       | 0.42     | DIMT1L       | 0.40     |
| MTHFD1       | 0.46     | PSMD2        | 0.45     | C21orf45     | 0.43     | VTA1         | 0.42     | EIF4E        | 0.40     |
| HNRNPD       | 0.46     | NHLRC2       | 0.45     | RAN          | 0.43     | RNGTT        | 0.42     | USP15        | 0.40     |
| LIG1         | 0.46     | RFC1         | 0.45     | IFT81        | 0.43     | WDR12        | 0.42     | PRMT5        | 0.40     |
| RNASEH1      | 0.46     | STIP1        | 0.45     | PPWD1        | 0.43     | MRPL30       | 0.42     | PCNP         | 0.40     |
| TMTC3        | 0.46     | CUL2         | 0.45     | POLR3G       | 0.43     | IDH3A        | 0.42     | CDT1         | 0.40     |
| <b>Genes</b> | <b>R</b> |
| C4orf21      | 0.46     | CCT5         | 0.45     | TYMS         | 0.43     | SLC30A6      | 0.42     | CCDC75       | 0.40     |
| CKAP2        | 0.46     | PPIL1        | 0.44     | EXOSC10      | 0.43     | NOLC1        | 0.42     | PELO         | 0.40     |
| ALG10        | 0.46     | FAM161A      | 0.44     | GTF3C4       | 0.43     | BRX1         | 0.41     | POLR2D       | 0.40     |
| DYNC1L1      | 0.46     | PPP4R2       | 0.44     | NCAPD2       | 0.43     | IPO9         | 0.41     | ETAA1        | 0.40     |
| TCERG1       | 0.46     | HMGB2        | 0.44     | ESCO2        | 0.43     | AGPS         | 0.41     | CIT          | 0.40     |
| HNRNPF       | 0.46     | FIGNL1       | 0.44     | ARHGAP19     | 0.43     | CWC22        | 0.41     | TSR1         | 0.40     |
| C6orf182     | 0.46     | <b>Genes</b> | <b>R</b> | MRPS18C      | 0.43     | NUS1         | 0.41     | POLK         | 0.40     |
| ISOC1        | 0.46     | LOC727896    | 0.44     | PANK3        | 0.43     | SAAL1        | 0.41     | C6orf211     | 0.40     |
| TROAP        | 0.46     | BCLAF1       | 0.44     | ZNF695       | 0.43     | GLE1         | 0.41     | UCK2         | 0.40     |
| C12orf48     | 0.46     | NUP205       | 0.44     | SFRS12       | 0.43     | CCDC18       | 0.41     | C10orf46     | 0.40     |
| TTF2         | 0.46     | RFC3         | 0.44     | SLC30A5      | 0.43     | UBE2K        | 0.41     | YY1          | 0.40     |
| WDR36        | 0.46     | CEP152       | 0.44     | CORO1C       | 0.43     | LIMS1        | 0.41     | PARP1        | 0.40     |
| KIF24        | 0.46     | NUDT5        | 0.44     | <b>Genes</b> | <b>R</b> | MAPK8        | 0.41     | MYO19        | 0.40     |
| FBXO45       | 0.46     | EIF2AK2      | 0.44     | KIAA0101     | 0.43     | FAM72A       | 0.41     | APITD1       | 0.40     |
| AURKB        | 0.46     | PPP2CA       | 0.44     | PGM2         | 0.43     | SMNDC1       | 0.41     | UBE2D2       | 0.40     |
| PPP3R1       | 0.46     | MOBK1B       | 0.44     | LSM11        | 0.43     | CPSF7        | 0.41     | TIAL1        | 0.40     |
| SLBP         | 0.46     | PTBP1        | 0.44     | ZFP91        | 0.43     | SNRPD3       | 0.41     | PA2G4P4      | 0.40     |
| RAD51C       | 0.46     | UHRF1BP1     | 0.44     | DR1          | 0.43     | TIFA         | 0.41     | EBNA1BP2     | 0.40     |
| DENR         | 0.46     | MND1         | 0.44     | LLPH         | 0.43     | <b>Genes</b> | <b>R</b> | ALMS1        | 0.40     |
| CEP97        | 0.46     | FAR1         | 0.44     | DBR1         | 0.43     | FANCC        | 0.41     | CTDSPL2      | 0.40     |
| HNRNPA3      | 0.46     | ZCCHC9       | 0.44     | DCUN1D5      | 0.42     | NOP58        | 0.41     | COMMD2       | 0.40     |
| LYAR         | 0.46     | FANCA        | 0.44     | TRAIP        | 0.42     | TAF9         | 0.41     | XRCC6        | 0.40     |
| TUBGCP4      | 0.46     | CENPP        | 0.44     | SOC54        | 0.42     | SUPT16H      | 0.41     | LARP1        | 0.40     |
| HNRNPU       | 0.46     | BZW1         | 0.44     | C1orf96      | 0.42     | QSOX2        | 0.41     | CACYBP       | 0.40     |
| CPSF2        | 0.46     | RNASEH2A     | 0.44     | TUBGCP5      | 0.42     | AEBP2        | 0.41     | <b>Genes</b> | <b>R</b> |
| HNRPLL       | 0.46     | C2orf44      | 0.44     | HAUS3        | 0.42     | IREB2        | 0.41     | MCM7         | 0.40     |
| LTV1         | 0.46     | C1orf112     | 0.44     | NUP93        | 0.42     | SMARCA5      | 0.41     | CLPX         | 0.40     |
| ZNF639       | 0.46     | VRK2         | 0.44     | SLC4A1AP     | 0.42     | SNRPA1       | 0.41     | TARS         | 0.40     |
| ILF3         | 0.46     | PTCD2        | 0.44     | LRRC40       | 0.42     | MARS         | 0.41     | EEF1E1       | 0.40     |
| HNRNPH1      | 0.45     | C5orf34      | 0.44     | CDC5L        | 0.42     | LIN52        | 0.41     | ZNF346       | 0.40     |
| DDX21        | 0.45     | PRPF40A      | 0.44     | RCC1         | 0.42     | RBM14        | 0.41     | CCDC41       | 0.40     |
| CNOT10       | 0.45     | DCP2         | 0.44     | PGAM4        | 0.42     | ICMT         | 0.41     | POLR2B       | 0.40     |
| SKA3         | 0.45     | CANX         | 0.44     | CCT4         | 0.42     | SYNCRIP      | 0.41     | HDAC3        | 0.40     |
| TAF3         | 0.45     | CHCHD4       | 0.44     | PHAX         | 0.42     | FAM72B       | 0.41     | ARSK         | 0.40     |
| MATR3        | 0.45     | NUP155       | 0.44     | WDR75        | 0.42     | ZW10         | 0.41     | LOC100128191 | 0.40     |
| HNRNPM       | 0.45     | YME1L1       | 0.44     | SRP19        | 0.42     | SMN2         | 0.41     | BRI3BP       | 0.40     |
| GMNN         | 0.45     | HNRNPA3P1    | 0.44     | MRPL3        | 0.42     | DDX18        | 0.41     | TCHP         | 0.40     |
| CHORDC1      | 0.45     | AMD1         | 0.44     | TUBG1        | 0.42     | MCM5         | 0.41     | POC5         | 0.40     |
| ATL2         | 0.45     | BRCA2        | 0.44     | KHSRP        | 0.42     | RPE          | 0.41     | METTL10      | 0.40     |
| FOXN2        | 0.45     | CCT2         | 0.44     | MRS2         | 0.42     | FUBP3        | 0.41     | C1orf163     | 0.40     |
| POLD1        | 0.45     | BMS1         | 0.44     | YWHAQ        | 0.42     | ZRANB3       | 0.41     | RFWD3        | 0.40     |
| GEMIN5       | 0.45     | TACC3        | 0.44     | MRPS9        | 0.42     | GFM2         | 0.41     | ZNF326       | 0.40     |
| RECQL        | 0.45     | RIOK2        | 0.44     | NFXL1        | 0.42     | C9orf80      | 0.41     | DCP1A        | 0.40     |
| DBF4         | 0.45     | C2orf3       | 0.44     | IDE          | 0.42     | TRIM59       | 0.41     | ENOPH1       | 0.40     |
| MTX3         | 0.45     | ZNF207       | 0.44     | C14orf106    | 0.42     | EAF1         | 0.41     | LOC221710    | 0.40     |
| PPAT         | 0.45     | CRY1         | 0.44     | PNPT1        | 0.42     | LOC441089    | 0.41     | CSNK1G1      | 0.40     |
| PAICS        | 0.45     | PPP1CC       | 0.44     | FOXMI        | 0.42     | HSP90AA1     | 0.41     | XRCC5        | 0.40     |
| ERCC6L       | 0.45     | PSMD14       | 0.44     | AHCTF1       | 0.42     | NAA25        | 0.41     | RBM25        | 0.40     |
|              |          | EWSR1        | 0.44     | MDC1         | 0.42     | PGM3         | 0.41     | CENPH        | 0.40     |

---

|           |      |
|-----------|------|
| PRPS1     | 0.40 |
| FIP1L1    | 0.40 |
| SART3     | 0.40 |
| HSPD1     | 0.40 |
| OGFOD1    | 0.40 |
| CXCL10    | 0.40 |
| TRIM37    | 0.40 |
| COL4A3BP  | 0.40 |
| SRFBP1    | 0.40 |
| TIMM17A   | 0.40 |
| MPHOSPH10 | 0.40 |
| ADAM17    | 0.40 |
| SPC24     | 0.40 |
| TAF2      | 0.40 |
| HSPA5     | 0.40 |

---

**Table S6.** Reactome pathway enrichment analysis for the top 50 genes positively correlated with *SPDL1* in colorectal cancer.

| PATHWAY NAME                                                                      | PATHWAY ID    | NO. OF GENES | P VALUE  | GENES                                                                                                                                           |
|-----------------------------------------------------------------------------------|---------------|--------------|----------|-------------------------------------------------------------------------------------------------------------------------------------------------|
| Cell Cycle, Mitotic                                                               | R-HSA-69278   | 27           | 1,11E-16 | PLK4;ZWILCH;NCAPG;BUB1B;CDC7;KIF23;MCM10;MASTL;SMC4;ZWINT;NCAPH;SMC2;SGO1;CCNA2;CENPE;SGO2; CNB1;KIF18A;CENPO;KIF20A;DNA2;SPDL1;FBXO5;BUB1      |
| Cell Cycle                                                                        | R-HSA-1640170 | 28           | 1,11E-16 | ZWILCH;NCAPG;BUB1B;MCM10;SMC4;NCAPH;SMC2;CCNB1;EXO1;SPDL1;FBXO5;BUB1;PLK4;CDC7;KIF23;MASTL; WINT;SGO1;CCNA2;CENPE;SGO2;KIF18A;CENPO;KIF20A;DNA2 |
| M Phase                                                                           | R-HSA-68886   | 20           | 2,22E-16 | PLK4;ZWILCH;NCAPG;BUB1B;KIF23;MASTL;SMC4;ZWINT;NCAPH;SMC2;SGO1;SGO2;CENPE;KIF18A;CNB1;CENPO;KIF20A;SPDL1;FBXO5;BUB1                             |
| Mitotic Prometaphase                                                              | R-HSA-68877   | 16           | 4,44E-16 | PLK4;ZWILCH;NCAPG;BUB1B;SMC4;ZWINT;NCAPH;SMC2;SGO1;SGO2;CENPE;KIF18A;CCNB1;CENPO;SPDL1;BUB1                                                     |
| Cell Cycle Checkpoints                                                            | R-HSA-69620   | 16           | 3,19E-14 | ZWILCH;BUB1B;MCM10;CDC7;ZWINT;SGO1;CCNA2;SGO2;CENPE;KIF18A;CCNB1;EXO1;CENPO;DNA2;SPDL1;BUB1                                                     |
| Amplification of signal from unattached kinetochores via a MAD2 inhibitory signal | R-HSA-141444  | 10           | 8,51E-12 | SGO1;CENPE;SGO2;KIF18A;ZWILCH;BUB1B;CENPO;SPDL1;BUB1;ZWINT                                                                                      |
| Amplification of signal from the kinetochores                                     | R-HSA-141424  | 10           | 8,51E-12 | SGO1;CENPE;SGO2;KIF18A;ZWILCH;BUB1B;CENPO;SPDL1;BUB1;ZWINT                                                                                      |
| Resolution of Sister Chromatid Cohesion                                           | R-HSA-2500257 | 11           | 1,11E-11 | SGO1;CENPE;SGO2;KIF18A;CCNB1;ZWILCH;BUB1B;CENPO;SPDL1;BUB1;ZWINT                                                                                |
| Mitotic Spindle Checkpoint                                                        | R-HSA-69618   | 10           | 4,25E-11 | SGO1;CENPE;SGO2;KIF18A;ZWILCH;BUB1B;CENPO;SPDL1;BUB1;ZWINT                                                                                      |
| EML4 and NUDC in mitotic spindle formation                                        | R-HSA-9648025 | 10           | 9,75E-11 | SGO1;CENPE;SGO2;KIF18A;ZWILCH;BUB1B;CENPO;SPDL1;BUB1;ZWINT                                                                                      |
| Mitotic Metaphase and Anaphase                                                    | R-HSA-2555396 | 12           | 5,31E-10 | SGO1;CENPE;SGO2;KIF18A;CCNB1;ZWILCH;BUB1B;FBXO5;CENPO;SPDL1;BUB1;ZWINT                                                                          |
| RHO GTPases Activate Formins                                                      | R-HSA-5663220 | 10           | 7,14E-10 | SGO1;CENPE;SGO2;KIF18A;ZWILCH;BUB1B;CENPO;SPDL1;BUB1;ZWINT                                                                                      |
| Condensation of Prometaphase Chromosomes                                          | R-HSA-2514853 | 5            | 6,62E-09 | CCNB1;NCAPG;SMC4;NCAPH;SMC2                                                                                                                     |
| Mitotic Anaphase                                                                  | R-HSA-68882   | 11           | 7,05E-09 | SGO1;CENPE;SGO2;KIF18A;CCNB1;ZWILCH;BUB1B;CENPO;SPDL1;BUB1;ZWINT                                                                                |
| Separation of Sister Chromatids                                                   | R-HSA-2467813 | 10           | 9,08E-09 | SGO1;CENPE;SGO2;KIF18A;ZWILCH;BUB1B;CENPO;SPDL1;BUB1;ZWINT                                                                                      |
| Signaling by Rho GTPases                                                          | R-HSA-194315  | 15           | 1,73E-07 | ARHGAP11A;ARHGAP11B;ZWILCH;BUB1B;ZWINT;SGO1;SGO2;CENPE;ANLN;DEPDC1B;KIF18A;TRA2B;CENPO;SPDL1;BUB1                                               |
| Signaling by Rho GTPases, Miro GTPases and RHOBTB3                                | R-HSA-9716542 | 15           | 2,30E-07 | ARHGAP11A;ARHGAP11B;ZWILCH;BUB1B;ZWINT;SGO1;SGO2;CENPE;ANLN;DEPDC1B;KIF18A;TRA2B;CENPO;SPDL1;BUB1                                               |
| Kinesins                                                                          | R-HSA-983189  | 6            | 4,66E-07 | CENPE;KIF18A;KIF23;KIF20A;KIF11                                                                                                                 |
| RHO GTPase Effectors                                                              | R-HSA-195258  | 10           | 1,02E-06 | SGO1;CENPE;SGO2;KIF18A;ZWILCH;BUB1B;CENPO;SPDL1;BUB1;ZWINT                                                                                      |
| COPI-dependent Golgi-to-ER retrograde traffic                                     | R-HSA-6811434 | 6            | 6,23E-06 | CENPE;KIF18A;KIF23;KIF20A;KIF11                                                                                                                 |
| Mitotic G1 phase and G1/S transition                                              | R-HSA-453279  | 7            | 8,38E-06 | CCNA2;CCNB1;MCM10;CDC7;FBXO5                                                                                                                    |
| Golgi-to-ER retrograde transport                                                  | R-HSA-8856688 | 6            | 3,82E-05 | CENPE;KIF18A;KIF23;KIF20A;KIF11                                                                                                                 |
| G1/S Transition                                                                   | R-HSA-69206   | 6            | 4,11E-05 | CCNA2;CCNB1;MCM10;CDC7;FBXO5                                                                                                                    |
| TP53 Regulates Transcription of Genes Involved in G1 Cell Cycle Arrest            | R-HSA-6804116 | 3            | 8,82E-05 | CCNA2;E2F7                                                                                                                                      |
| Factors involved in megakaryocyte development and platelet production             | R-HSA-983231  | 6            | 1,67E-04 | CENPE;KIF18A;KIF23;KIF20A;KIF11                                                                                                                 |
| TP53 Regulates Transcription of Cell Cycle Genes                                  | R-HSA-6791312 | 4            | 1,70E-04 | CCNA2;CCNB1;E2F7                                                                                                                                |
| Transcriptional Regulation by TP53                                                | R-HSA-3700989 | 9            | 1,90E-04 | FANCI;CCNA2;CCNB1;EXO1;DNA2;E2F7                                                                                                                |
| Intra-Golgi and retrograde Golgi-to-ER traffic                                    | R-HSA-6811442 | 6            | 3,11E-04 | CENPE;KIF18A;KIF23;KIF20A;KIF11                                                                                                                 |
| MHC class II antigen presentation                                                 | R-HSA-2132295 | 5            | 4,05E-04 | CENPE;KIF18A;KIF23;KIF20A;KIF11                                                                                                                 |
| Regulation of APC/C activators between G1/S and early anaphase                    | R-HSA-176408  | 4            | 4,27E-04 | CCNA2;CCNB1;BUB1B;FBXO5;BUB1                                                                                                                    |
| G2/M Checkpoints                                                                  | R-HSA-69481   | 5            | 4,84E-04 | CCNB1;EXO1;MCM10;CDC7;DNA2                                                                                                                      |
| Diseases of DNA repair                                                            | R-HSA-9675135 | 3            | 5,31E-04 | NEIL3;EXO1;DNA2                                                                                                                                 |
| Phosphorylation of Emi1                                                           | R-HSA-176417  | 2            | 5,42E-04 | CCNB1;FBXO5                                                                                                                                     |
| APC/C-mediated degradation of cell cycle proteins                                 | R-HSA-174143  | 4            | 6,27E-04 | CCNA2;CCNB1;BUB1B;FBXO5;BUB1                                                                                                                    |
| Regulation of mitotic cell cycle                                                  | R-HSA-453276  | 4            | 6,27E-04 | CCNA2;CCNB1;BUB1B;FBXO5;BUB1                                                                                                                    |
| MASTL Facilitates Mitotic Progression                                             | R-HSA-2465910 | 2            | 1,21E-03 | CCNB1;MASTL                                                                                                                                     |
| Condensation of Prophase Chromosomes                                              | R-HSA-2299718 | 3            | 1,65E-03 | CCNB1;SMC4;SMC2                                                                                                                                 |
| Mitotic Telophase/Cytokinesis                                                     | R-HSA-68884   | 2            | 1,87E-03 | KIF23;KIF20A                                                                                                                                    |

|                                                                                                                      |               |   |          |                                  |
|----------------------------------------------------------------------------------------------------------------------|---------------|---|----------|----------------------------------|
| Mitotic Prophase                                                                                                     | R-HSA-68875   | 4 | 2,54E-03 | CCNB1;MASTL;SMC4;SMC2            |
| DNA Replication                                                                                                      | R-HSA-69306   | 4 | 3,05E-03 | CCNA2;MCM10;CDC7;DNA2            |
| Transcription of E2F targets under negative control by p107 (RBL1) and p130 (RBL2) in complex with HDAC1             | R-HSA-1362300 | 2 | 3,28E-03 | CCNA2                            |
| RHOA GTPase cycle                                                                                                    | R-HSA-8980692 | 4 | 4,06E-03 | ARHGAP11A;ARHGAP11B;ANLN;DEPDC1B |
| APC/C:Cdc20 mediated degradation of mitotic proteins                                                                 | R-HSA-176409  | 3 | 4,10E-03 | CCNA2;CCNB1;BUB1B;BUB1           |
| NEIL3-mediated resolution of ICLs                                                                                    | R-HSA-9636003 | 1 | 4,19E-03 | NEIL3                            |
| Defective Base Excision Repair Associated with NEIL3                                                                 | R-HSA-9629232 | 1 | 4,19E-03 | NEIL3                            |
| Activation of APC/C and APC/C:Cdc20 mediated degradation of mitotic proteins                                         | R-HSA-176814  | 3 | 4,25E-03 | CCNA2;CCNB1;BUB1B;BUB1           |
| Polo-like kinase mediated events                                                                                     | R-HSA-156711  | 2 | 4,30E-03 | CCNB1                            |
| Defective HDR through Homologous Recombination (HRR) due to PALB2 loss of function                                   | R-HSA-9701193 | 2 | 4,67E-03 | EXO1;DNA2                        |
| Defective HDR through Homologous Recombination Repair (HRR) due to PALB2 loss of BRCA2/RAD51/RAD51C binding function | R-HSA-9704646 | 2 | 4,67E-03 | EXO1;DNA2                        |
| Defective HDR through Homologous Recombination Repair (HRR) due to PALB2 loss of BRCA1 binding function              | R-HSA-9704331 | 2 | 4,67E-03 | EXO1;DNA2                        |
| Diseases of DNA Double-Strand Break Repair                                                                           | R-HSA-9675136 | 2 | 4,67E-03 | EXO1;DNA2                        |
| G2/M DNA damage checkpoint                                                                                           | R-HSA-69473   | 3 | 4,89E-03 | CCNB1;EXO1;DNA2                  |
| TP53 Regulates Transcription of DNA Repair Genes                                                                     | R-HSA-6796648 | 3 | 6,33E-03 | FANCI                            |
| Processing of DNA double-strand break ends                                                                           | R-HSA-5693607 | 3 | 6,53E-03 | CCNA2;EXO1;DNA2                  |
| Resolution of D-loop Structures through Synthesis-Dependent Strand Annealing (SDSA)                                  | R-HSA-5693554 | 2 | 7,18E-03 | EXO1;DNA2                        |
| Regulation of TP53 Activity through Phosphorylation                                                                  | R-HSA-6804756 | 3 | 7,57E-03 | CCNA2;EXO1;DNA2                  |
| Cyclin A/B1/B2 associated events during G2/M transition                                                              | R-HSA-69273   | 2 | 8,13E-03 | CCNA2;CCNB1                      |
| Activation of the pre-replicative complex                                                                            | R-HSA-68962   | 2 | 1,02E-02 | MCM10;CDC7                       |
| Resolution of D-loop Structures through Holliday Junction Intermediates                                              | R-HSA-5693568 | 2 | 1,02E-02 | EXO1;DNA2                        |
| NOTCH3 Intracellular Domain Regulates Transcription                                                                  | R-HSA-9013508 | 2 | 1,02E-02 | DLGAP5                           |
| Resolution of D-Loop Structures                                                                                      | R-HSA-5693537 | 2 | 1,07E-02 | EXO1;DNA2                        |
| G0 and Early G1                                                                                                      | R-HSA-1538133 | 2 | 1,13E-02 | CCNA2                            |
| HDR through Single Strand Annealing (SSA)                                                                            | R-HSA-5685938 | 2 | 1,19E-02 | EXO1;DNA2                        |
| Activation of ATR in response to replication stress                                                                  | R-HSA-176187  | 2 | 1,19E-02 | MCM10;CDC7                       |
| G2/M Transition                                                                                                      | R-HSA-69275   | 4 | 1,22E-02 | PLK4;CCNA2;CCNB1                 |
| Mitotic G2-G2/M phases                                                                                               | R-HSA-453274  | 4 | 1,26E-02 | PLK4;CCNA2;CCNB1                 |
| Presynaptic phase of homologous DNA pairing and strand exchange                                                      | R-HSA-5693616 | 2 | 1,30E-02 | EXO1;DNA2                        |
| G1/S-Specific Transcription                                                                                          | R-HSA-69205   | 2 | 1,43E-02 | FBXO5                            |
| Homologous DNA Pairing and Strand Exchange                                                                           | R-HSA-5693579 | 2 | 1,49E-02 | EXO1;DNA2                        |
| HDR through Homologous Recombination (HRR) or Single Strand Annealing (SSA)                                          | R-HSA-5693567 | 3 | 1,55E-02 | CCNA2;EXO1;DNA2                  |
| Transcriptional Regulation by E2F6                                                                                   | R-HSA-8953750 | 2 | 1,62E-02 | CDC7                             |
| Mitotic Metaphase/Anaphase Transition                                                                                | R-HSA-68881   | 1 | 1,66E-02 | FBXO5                            |
| Homology Directed Repair                                                                                             | R-HSA-5693538 | 3 | 1,75E-02 | CCNA2;EXO1;DNA2                  |
| DNA Repair                                                                                                           | R-HSA-73894   | 5 | 1,93E-02 | FANCI;CCNA2;NEIL3;EXO1;DNA2      |
| Chromosome Maintenance                                                                                               | R-HSA-73886   | 3 | 2,04E-02 | CCNA2;CENPO;DNA2                 |
| Phosphorylation of proteins involved in the G2/M transition by Cyclin A:Cdc2 complexes                               | R-HSA-170145  | 1 | 2,08E-02 | CCNA2                            |
| G2 Phase                                                                                                             | R-HSA-68911   | 1 | 2,89E-02 | CCNA2                            |
| G2/M DNA replication checkpoint                                                                                      | R-HSA-69478   | 1 | 2,89E-02 | CCNB1                            |
| Signaling by NOTCH3                                                                                                  | R-HSA-9012852 | 2 | 2,90E-02 | DLGAP5                           |
| Diseases of Base Excision Repair                                                                                     | R-HSA-9605308 | 1 | 3,30E-02 | NEIL3                            |
| DNA Double-Strand Break Repair                                                                                       | R-HSA-5693532 | 3 | 3,38E-02 | CCNA2;EXO1;DNA2                  |
| Extension of Telomeres                                                                                               | R-HSA-180786  | 2 | 3,43E-02 | CCNA2;DNA2                       |

|                                                                                                          |               |   |          |                                        |
|----------------------------------------------------------------------------------------------------------|---------------|---|----------|----------------------------------------|
| HDR through Homologous Recombination (HRR)                                                               | R-HSA-5685942 | 2 | 3,70E-02 | EXO1;DNA2                              |
| E2F-enabled inhibition of pre-replication complex formation                                              | R-HSA-113507  | 1 | 3,71E-02 | CCNB1                                  |
| Activation of NIMA Kinases NEK9, NEK6, NEK7                                                              | R-HSA-2980767 | 1 | 3,71E-02 | CCNB1                                  |
| Cdc20:Phospho-APC/C mediated degradation of Cyclin A                                                     | R-HSA-174184  | 2 | 3,79E-02 | CCNA2;BUB1B;BUB1                       |
| APC:Cdc20 mediated degradation of cell cycle proteins prior to satisfaction of the cell cycle checkpoint | R-HSA-179419  | 2 | 3,89E-02 | CCNA2;BUB1B;BUB1                       |
| Regulation of TP53 Activity                                                                              | R-HSA-5633007 | 3 | 3,90E-02 | CCNA2;EXO1;DNA2                        |
| RHOB GTPase cycle                                                                                        | R-HSA-9013026 | 2 | 3,98E-02 | ANLN;DEPDC1B                           |
| RHOC GTPase cycle                                                                                        | R-HSA-9013106 | 2 | 4,37E-02 | ANLN;DEPDC1B                           |
| RHO GTPase cycle                                                                                         | R-HSA-9012999 | 5 | 4,37E-02 | ARHGAP11A;ARHGAP11B;ANLN;DEPDC1B;TRA2B |

**Table S7.** Gene ontology (GO) enrichment analysis for the top 50 genes positively correlated with *SPDL1* in colorectal cancer.

| GO TERMS                                                                                | GO ID      | COUNT | P VALUE  | GENES                                                                                                                                  |
|-----------------------------------------------------------------------------------------|------------|-------|----------|----------------------------------------------------------------------------------------------------------------------------------------|
| <b>Biological process</b>                                                               |            |       |          |                                                                                                                                        |
| Cell division                                                                           | GO:0051301 | 20    | 4,57E-20 | HELLS, ZWILCH, NCAPG, BUB1B, CDC7, KIF11, MASTL, SMC4, KNSTRN, NCAPH, ZWINT, SMC2, SGO1, CCNA2, CENPE, SGO2, CCNB1, SPDL1, FBXO5, BUB1 |
| Sister chromatid cohesion                                                               | GO:0007062 | 10    | 1,18E-11 | SGO1, CENPE, SGO2, KIF18A, ZWILCH, BUB1B, CENPO, SPDL1, BUB1, ZWINT                                                                    |
| Mitotic nuclear division                                                                | GO:0007067 | 11    | 1,65E-09 | SGO1, CCNA2, ANLN, HELLS, ZWILCH, BUB1B, KIF11, FBXO5, MASTL, BUB1, CEP55                                                              |
| Mitotic chromosome condensation                                                         | GO:0007076 | 5     | 7,84E-08 | NUSAP1, NCAPG, SMC4, NCAPH, SMC2                                                                                                       |
| Mitotic cytokinesis                                                                     | GO:0000281 | 5     | 1,32E-06 | ANLN, NUSAP1, KIF23, KIF20A, CEP55                                                                                                     |
| Mitotic cell cycle checkpoint                                                           | GO:0007093 | 5     | 1,99E-06 | ZWILCH, BUB1B, TTK, BUB1, ZWINT                                                                                                        |
| Mitotic metaphase plate congression                                                     | GO:0007080 | 5     | 3,62E-06 | CENPE, KIF18A, CCNB1, SPDL1, CEP55                                                                                                     |
| Meiotic chromosome segregation                                                          | GO:0045132 | 3     | 4,78E-05 | SGO1, SMC4, SMC2                                                                                                                       |
| Mitotic sister chromatid segregation                                                    | GO:0000070 | 4     | 4,82E-05 | NUSAP1, KNSTRN, SMC4, ZWINT                                                                                                            |
| Microtubule-based movement                                                              | GO:0007018 | 5     | 8,32E-05 | CENPE, KIF18A, KIF23, KIF20A, KIF11                                                                                                    |
| Protein localization to kinetochore                                                     | GO:0034501 | 3     | 3,55E-04 | BUB1B, TTK, SPDL1                                                                                                                      |
| Mitotic G2 DNA damage checkpoint                                                        | GO:0007095 | 3     | 8,20E-04 | CCNA2, FANCI, SLF1                                                                                                                     |
| Spindle organization                                                                    | GO:0007051 | 3     | 9,36E-04 | TTK, KIF11, KNSTRN                                                                                                                     |
| Chromosome segregation                                                                  | GO:0007059 | 4     | 9,64E-04 | SGO1, CENPE, KIF11, KNSTRN                                                                                                             |
| DNA replication                                                                         | GO:0006260 | 5     | 9,91E-04 | RRM1, EXO1, MCM10, CDC7, DNA2                                                                                                          |
| Mitotic spindle assembly checkpoint                                                     | GO:0007094 | 3     | 1,47E-03 | BUB1B, TTK, BUB1                                                                                                                       |
| Retrograde vesicle-mediated transport, Golgi to ER                                      | GO:0006890 | 4     | 1,66E-03 | CENPE, KIF18A, KIF23, KIF11                                                                                                            |
| Antigen processing and presentation of exogenous peptide antigen via MHC class II       | GO:0019886 | 4     | 2,30E-03 | CENPE, KIF18A, KIF23, KIF11                                                                                                            |
| Mitotic spindle organization                                                            | GO:0007052 | 3     | 3,31E-03 | CCNB1, TTK, KIF11                                                                                                                      |
| DNA replication initiation                                                              | GO:0006270 | 3     | 3,76E-03 | SLF1, MCM10, CDC7                                                                                                                      |
| G2/M transition of mitotic cell cycle                                                   | GO:0000086 | 4     | 7,03E-03 | PLK4, CCNB1, MELK, MASTL                                                                                                               |
| Kinetochore organization                                                                | GO:0051383 | 2     | 8,55E-03 | SMC4, SMC2                                                                                                                             |
| Mitotic chromosome movement towards spindle pole                                        | GO:0007079 | 2     | 1,14E-02 | CENPE, DLGAP5                                                                                                                          |
| Meiotic chromosome condensation                                                         | GO:0010032 | 2     | 1,42E-02 | SMC4, SMC2                                                                                                                             |
| Negative regulation of ubiquitin-protein ligase activity involved in mitotic cell cycle | GO:0051436 | 3     | 1,75E-02 | CCNB1, BUB1B, FBXO5                                                                                                                    |
| Positive regulation of ubiquitin-protein ligase activity                                | GO:0051437 | 3     | 1,99E-02 | CCNB1, BUB1B, FBXO5                                                                                                                    |

|                                                         |            |    |          |                                                                                                                                                                                                   |
|---------------------------------------------------------|------------|----|----------|---------------------------------------------------------------------------------------------------------------------------------------------------------------------------------------------------|
| involved in regulation of mitotic cell cycle transition |            |    |          |                                                                                                                                                                                                   |
| Cell proliferation                                      | GO:0008283 | 5  | 2,03E-02 | MELK, BUB1B, MCM10, BUB1, DLGAP5                                                                                                                                                                  |
| Trophoblast giant cell differentiation                  | GO:0060707 | 2  | 3,38E-02 | PLK4, E2F7                                                                                                                                                                                        |
| G1/S transition of mitotic cell cycle                   | GO:0000082 | 3  | 3,44E-02 | MCM10, CDC7, FBXO5                                                                                                                                                                                |
| Centriole replication                                   | GO:0007099 | 2  | 4,48E-02 | PLK4, SASS6                                                                                                                                                                                       |
| Peptidyl-serine phosphorylation                         | GO:0018105 | 3  | 4,97E-02 | TTK, CDC7, MASTL                                                                                                                                                                                  |
| <b>Cellular components</b>                              |            |    |          |                                                                                                                                                                                                   |
| Kinetochores                                            | GO:0000776 | 9  | 4,93E-11 | SGO1, CENPE, KIF18A, ZWILCH, BUB1B, TTK, KNSTRN, BUB1, ZWINT                                                                                                                                      |
| Condensed chromosome kinetochores                       | GO:0000777 | 9  | 8,85E-11 | SGO1, CENPE, SGO2, ZWILCH, BUB1B, CENPO, KNSTRN, BUB1, ZWINT                                                                                                                                      |
| Nucleoplasm                                             | GO:0005654 | 26 | 9,06E-09 | MCM10, HNRNP, SMC4, SMC2, CCNB1, EXO1, TRA2B, FBXO5, BUB1, E2F7, FANCI, WDHD1, RRM1, KIF23, CDC7, MASTL, SGO1, CCNA2, SGO2, MMS22L, ANLN, NEIL3, DEPDC1, KIF20A, CENPO, DNA2                      |
| Condensin complex                                       | GO:0000796 | 4  | 1,94E-07 | NCAPG, SMC4, NCAPH, SMC2                                                                                                                                                                          |
| Spindle                                                 | GO:0005819 | 7  | 9,47E-07 | NUSAP1, KIF23, TTK, KIF20A, KIF11, FBXO5, SHCBP1                                                                                                                                                  |
| Centrosome                                              | GO:0005813 | 10 | 2,05E-06 | SGO1, PLK4, SLF1, CCNB1, CKAP2L, SASS6, NCAPG, KIF23, MASTL, CEP55                                                                                                                                |
| Spindle pole                                            | GO:0000922 | 6  | 1,19E-05 | SGO1, CCNB1, CKAP2L, KIF11, SPD11, KNSTRN                                                                                                                                                         |
| Kinesin complex                                         | GO:0005871 | 5  | 1,33E-05 | CENPE, KIF18A, KIF23, KIF20A, KIF11                                                                                                                                                               |
| Cytosol                                                 | GO:0005829 | 23 | 2,20E-05 | ARHGAP11A, PLK4, ARHGAP11B, RRM1, ZWILCH, NCAPG, BUB1B, KIF23, KIF11, SMC4, NCAPH, ZWINT, SMC2, SGO1, CENPE, SGO2, KIF18A, DEPDC1B, CCNB1, CENPO, SPD11, FBXO5, BUB1                              |
| Cytoplasm                                               | GO:0005737 | 28 | 1,46E-04 | NCAPG, BUB1B, MCM10, TTK, KIF11, SMC4, SMC2, KIAA1524, CCNB1, EXO1, NUSAP1, FBXO5, BUB1, DLGAP5, FANCI, WDHD1, SLF1, RRM1, CKAP2L, CDC7, MASTL, KNSTRN, SHCBP1, ZWINT, SGO1, CCNA2, CENPE, KIF18A |
| Condensed chromosome outer kinetochores                 | GO:0000940 | 3  | 2,04E-04 | CENPE, BUB1B, SPD11                                                                                                                                                                               |
| Nucleus                                                 | GO:0005634 | 28 | 2,82E-04 | NCAPG, MCM10, SMC4, NCAPH, SMC2, CCNB1, EXO1, TRA2B, NUSAP1, FBXO5, SPD11, E2F7, DLGAP5, HELLS, SLF1, KIF23, CDC7, MASTL, KNSTRN, ZWINT, SGO1, CCNA2, CENPE, KIF18A, NEIL3, MELK, DEPDC1, DNA2    |
| Midbody                                                 | GO:0030496 | 5  | 4,29E-04 | CENPE, KIF23, KIF20A, SHCBP1, CEP55                                                                                                                                                               |
| Chromosome, centromeric region                          | GO:0000775 | 4  | 5,12E-04 | SGO1, CENPE, SGO2, HELLS                                                                                                                                                                          |
| Microtubule                                             | GO:0005874 | 6  | 1,58E-03 | CENPE, KIF18A, NUSAP1, KIF23, KIF20A, KIF11                                                                                                                                                       |
| Microtubule cytoskeleton                                | GO:0015630 | 4  | 6,29E-03 | CENPE, KIF18A, CDC7, KNSTRN                                                                                                                                                                       |
| Intercellular bridge                                    | GO:0045171 | 3  | 6,48E-03 | KIF23, CDC7, CEP55                                                                                                                                                                                |
| Cleavage furrow                                         | GO:0032154 | 3  | 7,37E-03 | PLK4, MASTL, CEP55                                                                                                                                                                                |
| Microtubule organizing center                           | GO:0005815 | 4  | 8,52E-03 | KIF18A, BUB1B, SPD11, DLGAP5                                                                                                                                                                      |
| Condensed nuclear chromosome outer kinetochores         | GO:0000942 | 2  | 1,09E-02 | CCNB1, BUB1                                                                                                                                                                                       |
| Deuterosome                                             | GO:0098536 | 2  | 1,36E-02 | PLK4, SASS6                                                                                                                                                                                       |
| Condensed chromosome, centromeric region                | GO:0000779 | 2  | 1,91E-02 | SGO1, CENPE                                                                                                                                                                                       |
| Mitotic spindle midzone                                 | GO:1990023 | 2  | 2,44E-02 | CENPE, KIF18A                                                                                                                                                                                     |
| Chromosome                                              | GO:0005694 | 3  | 3,37E-02 | CENPE, NUSAP1, SMC4                                                                                                                                                                               |
| Centriole                                               | GO:0005814 | 3  | 3,85E-02 | PLK4, SASS6, CEP55                                                                                                                                                                                |
| <b>Molecular function</b>                               |            |    |          |                                                                                                                                                                                                   |
| Protein binding                                         | GO:0005515 | 43 | 7,15E-07 |                                                                                                                                                                                                   |
| ATP binding                                             | GO:0005524 | 17 | 2,63E-06 | PLK4, HELLS, RRM1, BUB1B, TTK, KIF23, CDC7, KIF11, MASTL, SMC4, SMC2, CENPE, KIF18A, MELK, KIF20A, DNA2, BUB1                                                                                     |
| Microtubule motor activity                              | GO:0003777 | 5  | 8,43E-05 | CENPE, KIF18A, KIF23, KIF20A, KIF11                                                                                                                                                               |
| Microtubule binding                                     | GO:0008017 | 6  | 3,32E-04 | CENPE, KIF18A, NUSAP1, KIF23, KIF20A, KIF11                                                                                                                                                       |
| Protein serine/threonine kinase activity                | GO:0004674 | 7  | 7,31E-04 | PLK4, MELK, BUB1B, TTK, CDC7, MASTL, BUB1                                                                                                                                                         |
| Kinetochores binding                                    | GO:0043515 | 2  | 1,16E-02 | CENPE, SPD11                                                                                                                                                                                      |
| ATPase activity                                         | GO:0016887 | 4  | 1,60E-02 | CENPE, KIF23, KIF20A, DNA2                                                                                                                                                                        |

---

|                                                             |            |   |          |                                       |
|-------------------------------------------------------------|------------|---|----------|---------------------------------------|
| Protein kinase binding                                      | GO:0019901 | 5 | 2,34E-02 | CCNA2, CCNB1, KIF20A, KIF11, FBXO5    |
| GTPase activator activity                                   | GO:0005096 | 4 | 4,71E-02 | ARHGAP11A, ARHGAP11B, DEPDC1B, DEPDC1 |
| ATP-dependent microtubule motor activity, plus-end-directed | GO:0008574 | 2 | 4,82E-02 | KIF18A, KIF11                         |

---

**Table S8.** Missing data on testing variables.

| Variable        | Missing data   |                 |
|-----------------|----------------|-----------------|
|                 | TMA cohort (%) | TCGA cohort (%) |
| survival time   | 8 (10.7)       | 4 (1.5)         |
| survival status | 0 (0)          | 4 (1.5)         |
| grade           | 2 (2.7)        | -               |
| pN              | 3 (4.0)        | 0 (0)           |
| pM              | 6 (8.0)        | 6 (2.2)         |
| VI              | 40 (53.3)      | -               |
| PNI             | 50 (66.7)      | -               |

Abbreviations: pM - distant metastasis, pN - regional lymph node, PNI - perineural invasion, TCGA - The Cancer Genome Atlas, TMA - tissue microarray, VI - vascular invasion. “-” indicates lack of data on variable.

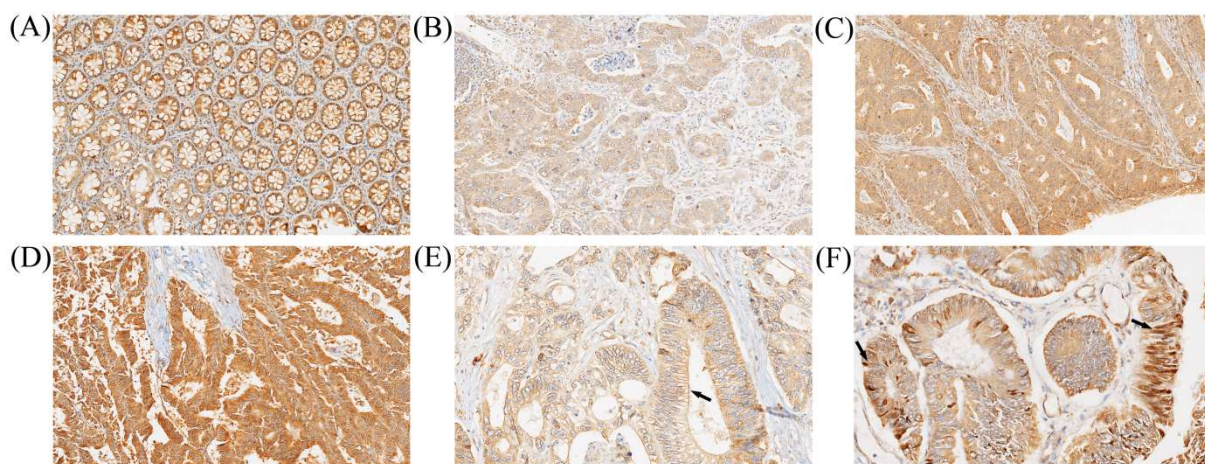

**Figure S1.** Representative immunohistochemical SPDL1 protein stains showing (A) moderately positive staining in normal tissue; original magnifications: 10×; (B) weakly positive staining in CRC; original magnifications: 10×; (C) moderately positive staining in CRC; original magnifications: 10×; (D) strongly positive staining in CRC; original magnifications: 10×; (E) membrane staining in addition to cytoplasmic staining in CRC (arrow), original magnifications: 20×; (F) several positive nuclei in addition to cytoplasmic staining in CRC (arrows); original magnifications: 20×.

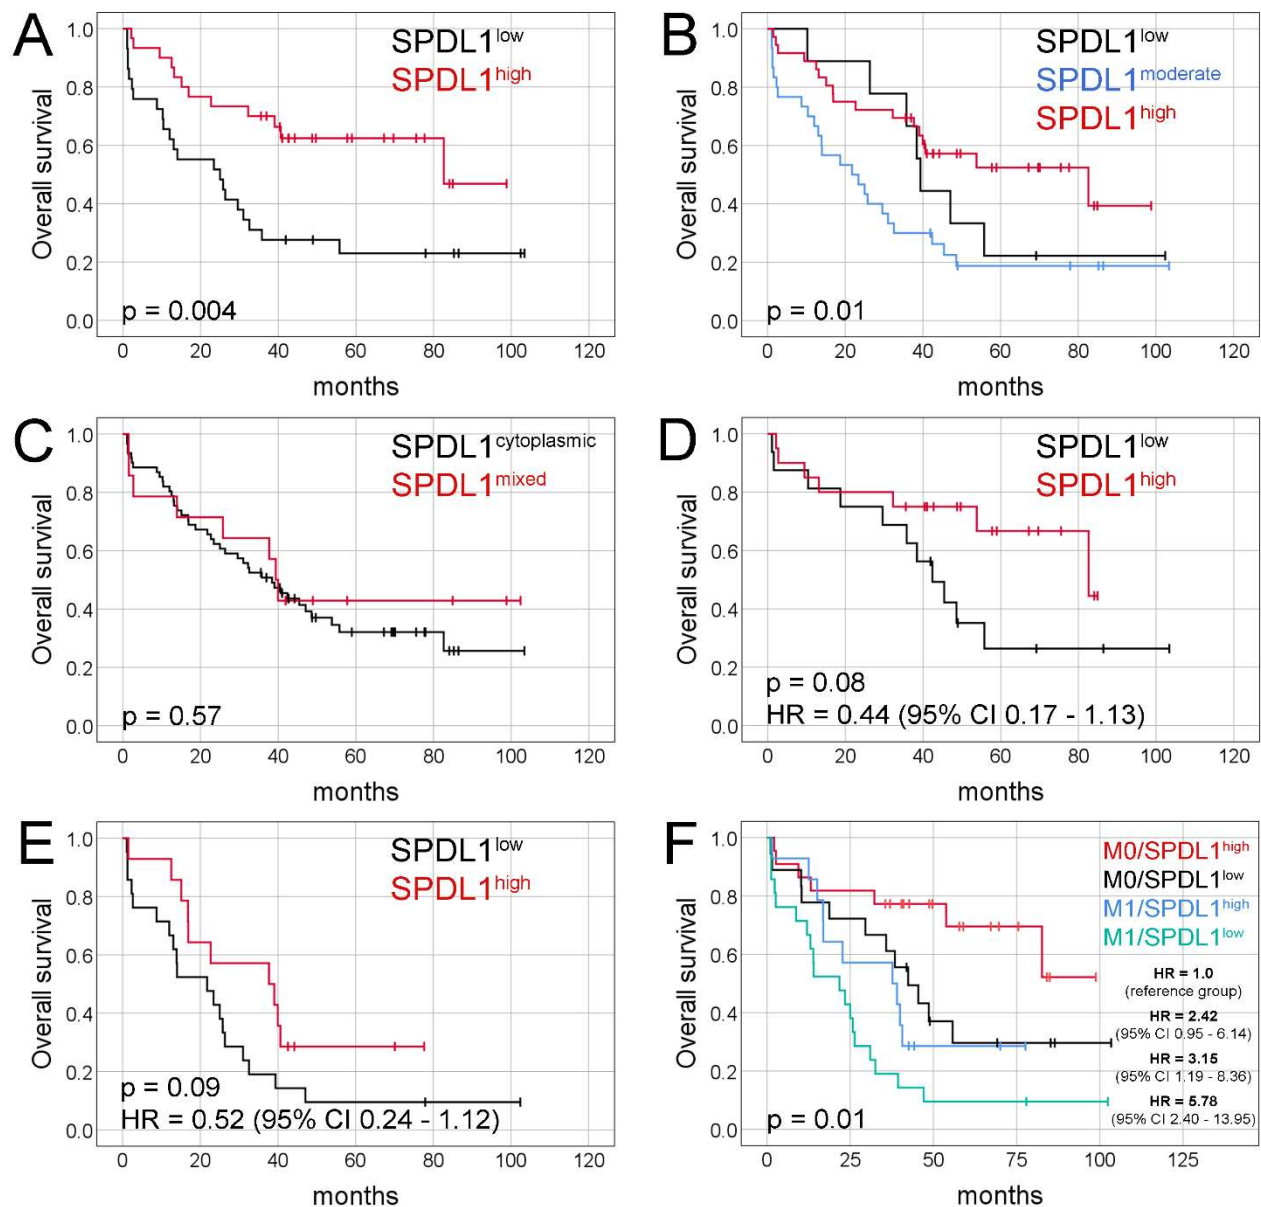

**Figure S2.** Kaplan-Meier survival curves and log-rank test for overall survival of CRC patients in TMA cohort according to SPDL1 protein expression (A) when the analysis was restricted to individuals with complete data ( $n=59$ ); (B) after splitting the IRS scores into three groups: low ( $n = 9$ ; IRS  $< 5$ ), moderate ( $n = 30$ ; IRS  $\geq 5 < 7.5$ ) and high ( $n = 36$ ; IRS  $\geq 7.5$ ); (C) when the analysis was based on the subcellular staining pattern: purely cytoplasmic ( $n = 61$ ) or mixed pattern ( $n = 14$ ; nuclear and cytoplasmic or membranous and cytoplasmic); (D) when the analysis was restricted to AJCC TNM stage II-III CRCs ( $n = 36$ ; the cut-off 7.5); (E) when the analysis was restricted to AJCC TNM stage IV CRCs ( $n = 35$ ; the cut-off 7.5); (F) when stratified by metastatic (pM) status [M0/SPDL1<sup>high</sup>: patient without distant metastasis and SPDL1-high expression,  $n = 22$ ; M0/SPDL1<sup>low</sup>: patient without distant metastasis and SPDL1-low expression,  $n = 18$ ; M1/SPDL1<sup>high</sup>: patient with distant metastasis and SPDL1-high expression,  $n = 14$ ; M1/SPDL1<sup>low</sup>: patient with distant metastasis and SPDL1-low expression,  $n = 21$ ; the p value shown has been pooled over strata]. HR: hazard ratio (Cox proportional hazards model), CI: confidence interval.

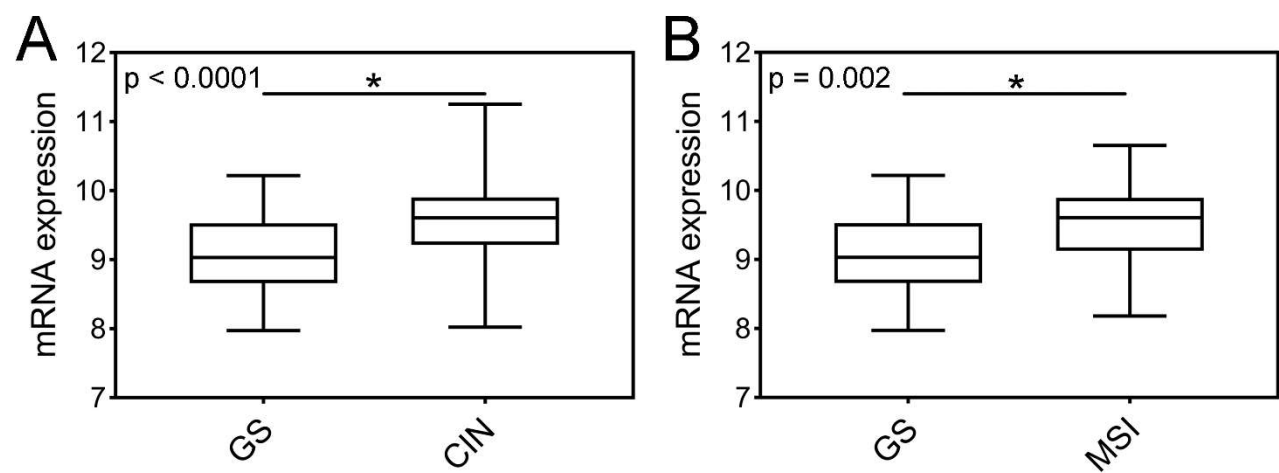

**Figure S3.** The expression level of *SPDL1* in (A) chromosomal instability (CIN subtype) colorectal cancer; (B) microsatellite instability (MSI subtype) colorectal cancer compared to genomically stable (GS subtype) tumors. The error bars present the range from minimum to maximum values of data. Asterisks (\*) indicate statistically significant differences ( $p < 0.05$ ).

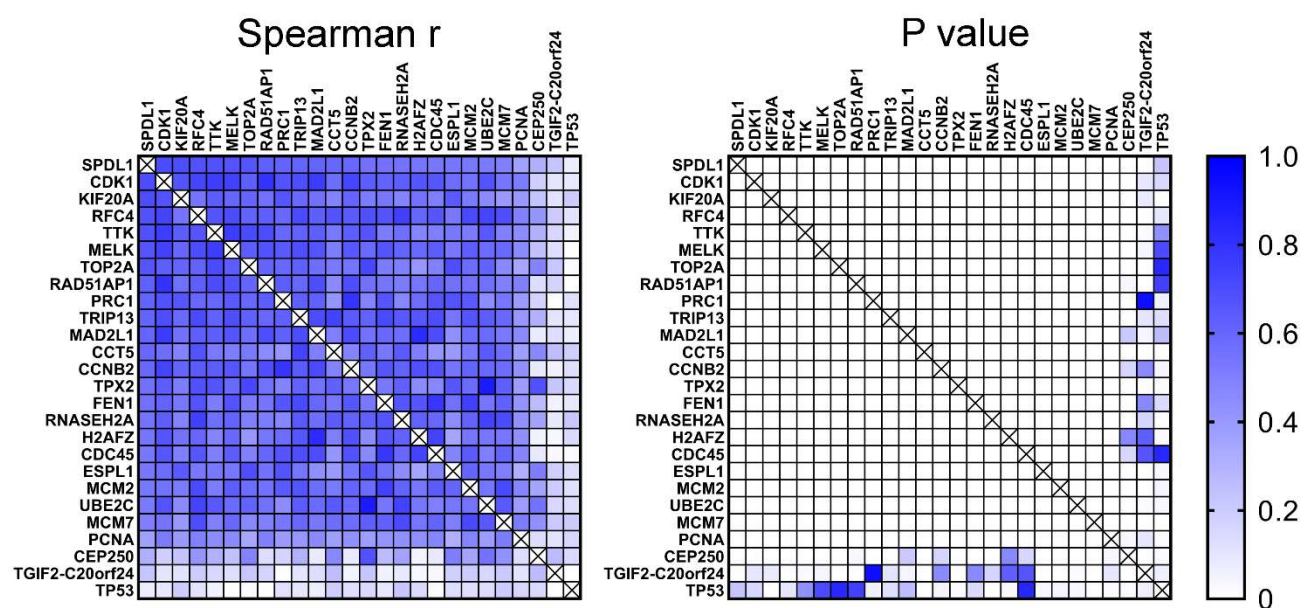

**Figure S4.** Heatmaps presenting Spearman correlation and P value between the expression of *SPDL1* and 25 genes associated with functional aneuploidy (CIN25 signature).

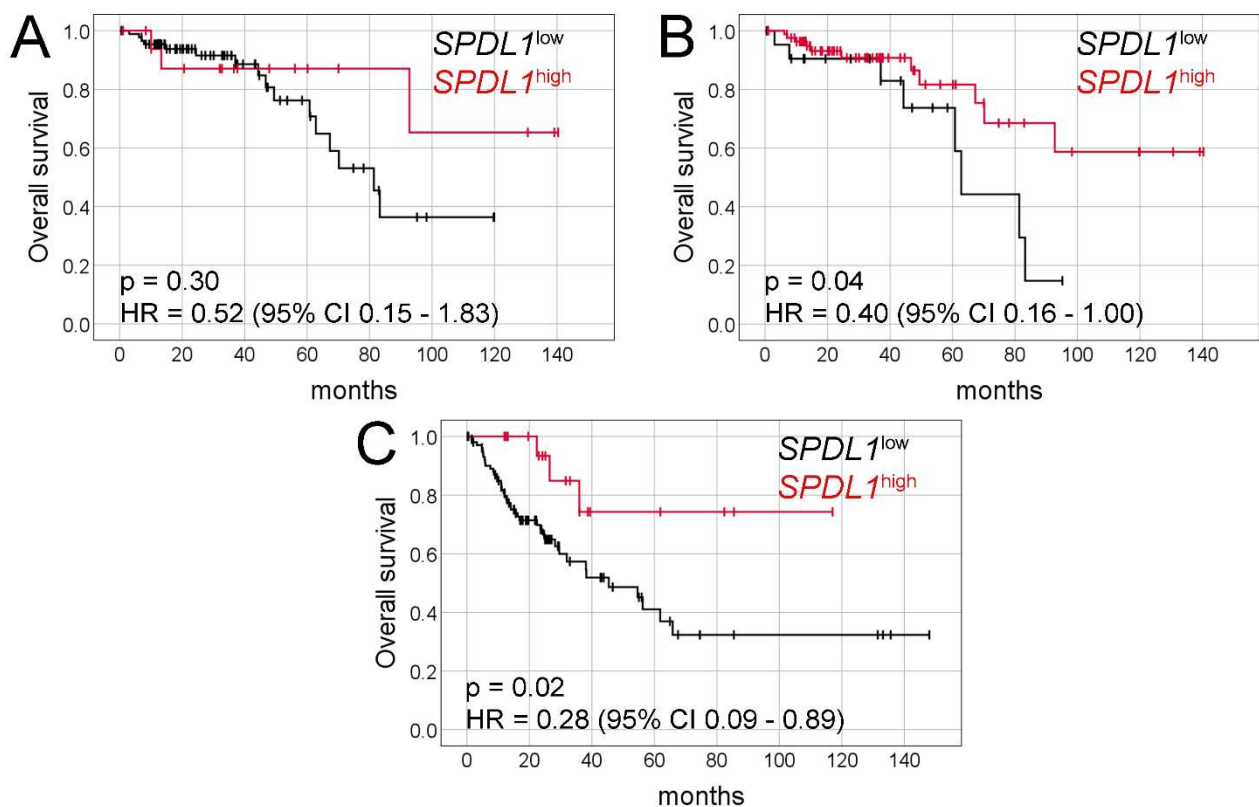

**Figure S5.** Kaplan-Meier survival curves and log-rank test for overall survival in the TCGA cohort based on *SPDL1* mRNA expression in distinct AJCC TNM stage CRC patients (A) stage II with the cut-off 9.992 (n = 107); (B) stage II with the cut-off 9.02 (n = 107); (C) stage III-IV with the cut-off 9.992 (n = 123). HR: hazard ratio (Cox proportional hazards model). CI: confidence interval.
